# Supplementary material for: Ambient l-lactic acid crystal polymorphism
Source: Royal Society of Chemistry journal article supplement (doi:10.1039/d1ce00285f), 2021-01-01
Supplement: d1ce00285f1.pdf [file d1ce00285f1.pdf]

## Supporting information

### Ambient *L*-Lactic Acid Crystal Polymorphism

*Jingxiang Yang<sup>a</sup>, Chunhua T. Hu<sup>a</sup>, Ethan Reiter<sup>a</sup>, and Bart Kahr<sup>\*a</sup>*

#### Table of Contents

##### Materials and Methods

**Figure S1.** Micro-Raman spectroscopy of single crystals of LLA Forms I, II and III.

**Figure S2.** Single crystals of LLA Form II (A) and Form III (B) with Miller indices of observable faces.

**Table S1.** Selected single crystal data for Forms I, II and III.

**LLA Form I CheckCIF:** [Form I\_120bek1h\_checkcif.pdf]

**LLA Form II CheckCIF:** [Form II\_18bek65h\_checkcif.pdf]

**LLA Form III CheckCIF:** [Form III\_18bek42h\_checkcif.pdf]

Corresponding CIF Files can be evaluated at these links.

<https://www.ccdc.cam.ac.uk/structures/Search?access=referee&ccdc=2062531&Author=Jingxiang+Yang>

<https://www.ccdc.cam.ac.uk/structures/Search?access=referee&ccdc=1962562&Author=Jingxiang+Yang>

<https://www.ccdc.cam.ac.uk/structures/Search?access=referee&ccdc=1962561&Author=Jingxiang+Yang>

**Materials and methods.** All solvents used here were reagent grade and used as received (Sigma-Aldrich, St. Louis, MO). L-lactic acid (LLA, CAS Number 79-33-4) was obtained from Sigma-Aldrich and used as received.

**Raman spectroscopy.** Raman spectra were recorded on a Raman microscope (DXR, Thermo Fisher Scientific, Waltham, MA) using a 532 nm excitation laser operating at 2 mW, with a  $2\text{ cm}^{-1}$  resolution and slit width of 50  $\mu\text{m}$ . The data was analyzed using the Omnic software package.

**Single crystal structure determination.** The X-ray intensity data of LLA Forms II and III were recorded on a Bruker D8 APEX-II CCD system using a graphite monochromator, 0.5 mm MonoCap-collimated Mo-K $\alpha$  radiation ( $\lambda = 0.71073\text{ \AA}$ ), and the  $\omega$  scan method at 100 K. Temperature was controlled by an Oxford Cryosystems 700+ Cooler. The datasets were processed with the INTEGRATE program of the APEX2 software for reduction and cell refinement. Multi-scan absorption corrections were applied by the SCALE program for the area detector. Both structures were solved by intrinsic phasing methods (SHELXT) and the structure models were completed and refined using the full-matrix least-square methods on  $F^2$  (SHELXL). Non-hydrogen atoms in the structures were refined with anisotropic displacement parameters, and hydrogen atoms on carbons were placed in idealized positions (C-H = 0.95-1.00  $\text{\AA}$ ) and included as riding with  $U_{\text{iso(H)}} = 1.2$  or  $1.5 U_{\text{eq(non-H)}}$ . The selected crystallographic parameters were listed in Table S1. The crystallographic information files (CIFs) including the HKL and RES data are deposited in the CCDC with numbers 1962562 (Form II) and 1962561 (Form III). Crystal indexing was performed using the Crystal Faces program of the APEX2 software.

**Polarized light microscopy.** A microscope fitted with crossed polarizers (Olympus BX50) and equipped with a digital camera was used to record the phase behavior among LLA polymorphs. A microscope hot stage (Mettler FP82HT) was used for temperature control.

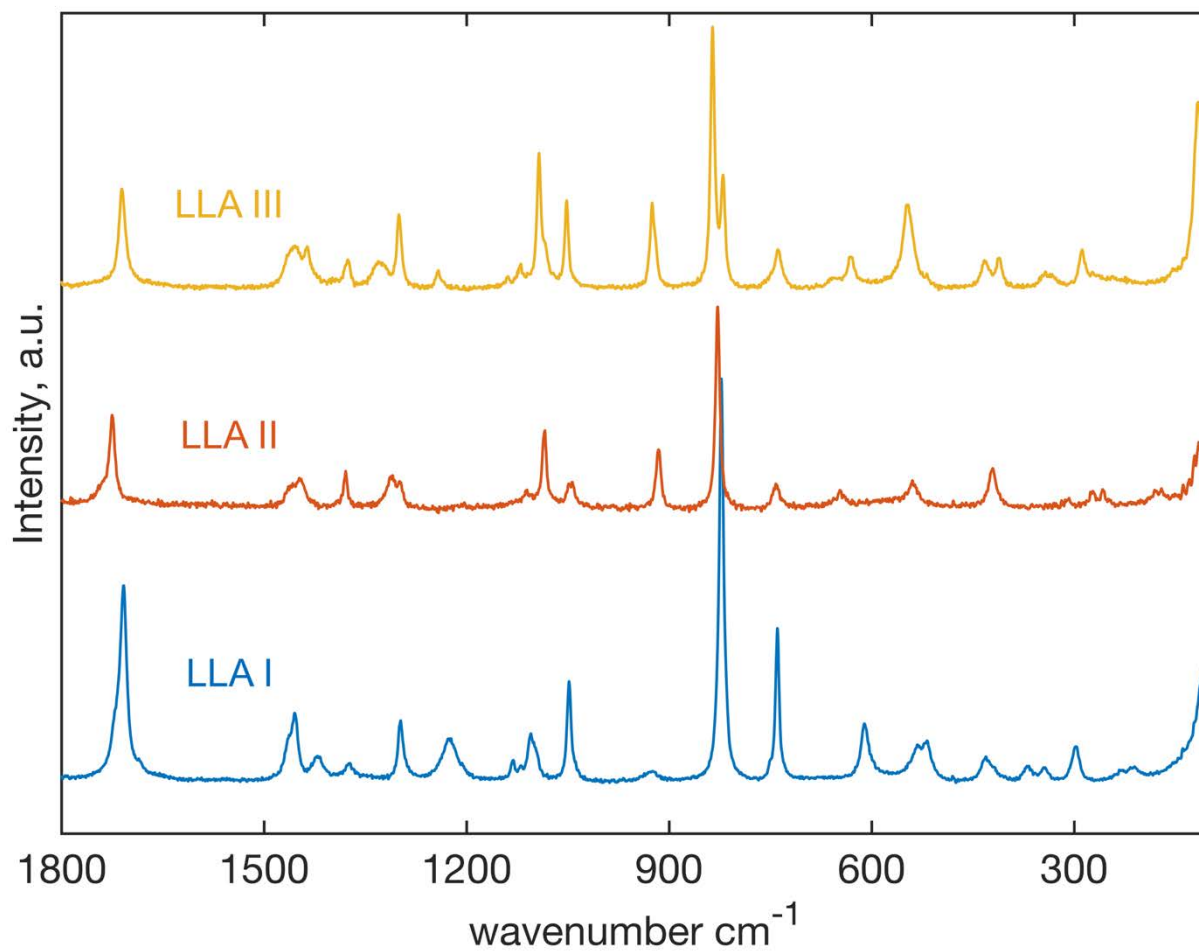

**Figure S1.** Raman spectra of single crystals of LLA Forms I (black), Form II (red) and Form III (blue). The size of the laser beam was 0.7  $\mu\text{m}$ .

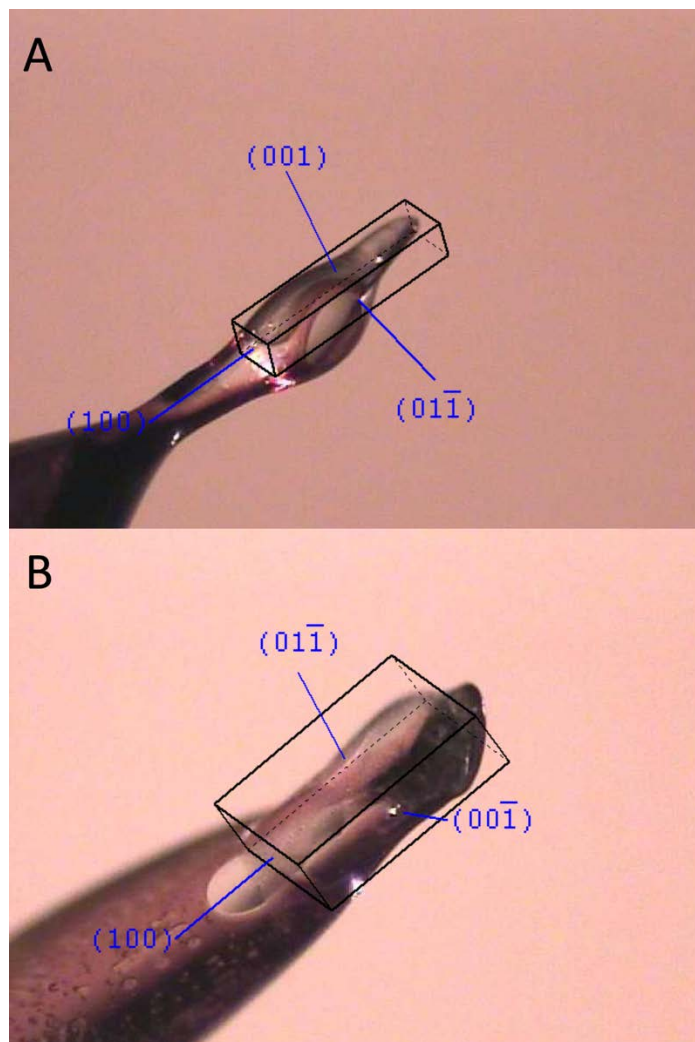

**Figure S2.** Single crystals of LLA II (A) and LLA III (B) with Miller indices. The crystal faces were rounded by LLA's hydroscopicity.

**Table S1.** Selected single crystal data for LLA Forms I, II and III.

|                                                                      | LLA Form I                                                 | LLA Form II                                                | LLA Form III                                               |
|----------------------------------------------------------------------|------------------------------------------------------------|------------------------------------------------------------|------------------------------------------------------------|
| <b>Formula</b>                                                       | C <sub>3</sub> H <sub>6</sub> O <sub>3</sub>               | C <sub>3</sub> H <sub>6</sub> O <sub>3</sub>               | C <sub>3</sub> H <sub>6</sub> O <sub>3</sub>               |
| <b>Formula weight</b>                                                | 90.08                                                      | 90.08                                                      | 90.08                                                      |
| <b>Crystal system</b>                                                | Orthorhombic                                               | Orthorhombic                                               | Orthorhombic                                               |
| <b>Space group (no.)</b>                                             | <i>P</i> 2 <sub>1</sub> 2 <sub>1</sub> 2 <sub>1</sub> (19) | <i>P</i> 2 <sub>1</sub> 2 <sub>1</sub> 2 <sub>1</sub> (19) | <i>P</i> 2 <sub>1</sub> 2 <sub>1</sub> 2 <sub>1</sub> (19) |
| <b><i>a</i> (Å)</b>                                                  | 5.4954(4)                                                  | 5.759(3)                                                   | 5.7323(3)                                                  |
| <b><i>b</i> (Å)</b>                                                  | 8.4298(5)                                                  | 5.772(3)                                                   | 9.0190(5)                                                  |
| <b><i>c</i> (Å)</b>                                                  | 9.3517(6)                                                  | 12.492(7)                                                  | 17.3579(10)                                                |
| <b><i>V</i> (Å<sup>3</sup>)</b>                                      | 433.22(1)                                                  | 415.3(4)                                                   | 897.49(9)                                                  |
| <b><i>Z</i></b>                                                      | 4                                                          | 4                                                          | 8                                                          |
| <b><i>D</i><sub>c</sub> (g cm<sup>-3</sup>)</b>                      | 1.385                                                      | 1.441                                                      | 1.333                                                      |
| <b>μ(mm<sup>-1</sup>)</b>                                            | 0.12                                                       | 0.131                                                      | 0.121                                                      |
| <b><i>F</i>(000)</b>                                                 | 192                                                        | 192                                                        | 384                                                        |
| <b>Total reflections</b>                                             | 1508                                                       | 8526                                                       | 14087                                                      |
| <b>Unique reflections</b>                                            | 976                                                        | 1247                                                       | 2237                                                       |
| <b><i>R</i><sub>int</sub></b>                                        | 0.012                                                      | 0.0735                                                     | 0.0310                                                     |
| <b>GOF (all data)</b>                                                | 1.09                                                       | 1.062                                                      | 1.051                                                      |
| <b><i>R</i><sub>1</sub><sup>a</sup> [<i>I</i> &gt; 2σ(<i>I</i>)]</b> | 0.030                                                      | 0.0493                                                     | 0.0283                                                     |
| <b>w<i>R</i><sub>2</sub><sup>b</sup> (all data)</b>                  | 0.074                                                      | 0.1226                                                     | 0.0717                                                     |
| <b>T/K</b>                                                           | 100                                                        | 100                                                        | 100                                                        |

<sup>a</sup>  $R_1 = \Sigma ||F_o| - |F_c|| / \Sigma |F_o|$ ; <sup>b</sup>  $wR^2 = \{ \Sigma [w(F_o^2 - F_c^2)^2] / \Sigma [w(F_o^2)^2] \}^{1/2}$
